# Supplementary material
Source: publisher site journal article supplement (https://www.dovepress.com/article/441307)
Supplement: Supplementary file 1 [file get_supplementary_file.php]

**Supplementary materials**

**Methods**

**Immunofluorescence staining**

Another portion of rats was sacrificed on day 3 after AMI to measure macrophage infiltration in the border zone of infarction. Briefly, paraffin-embedded heart sections were deparaffinized and rehydrated. Then antigen retrieval was performed with TE buffer, permeabilized with PBS supplemented with 0.1% TritonX-100 for 10 min and blocked by PBS supplemented with 5% BSA for 1 hour at room temperature. Then sections were incubated with primary antibodies at 4°C overnight followed by incubation with secondary antibodies for 1 hour at room temperature. Finally, 4’,6-diamidino-2-phenylindole (DAPI, ZLI-9557, ZSGB-BIO, China) was used to stain the nucleus. The samples were observed using a confocal microscope (SP8, Leica, Germany) and positively stained cells were counted in five randomly chosen high-power fields (HPFs) per section.

**Enzyme-linked immunosorbent assay**

The levels of IL-6 and TNF-α in the heart tissues and IL-1β, TNF-α, IL-4, IL-10, and VEGF-a in the culture medium of bone marrow-derived macrophages were detected by reagent kits following the manufacturer’s instructions (E-EL-R0015c, E-EL-R2856c, E-EL-R0012, E-EL-R0014c, E-EL-R0016c,E-EL-R2603c, Elabscience, China).

**CCK8 assay**

To assess cell viability, MSC were seeded into a 96-well plate (4 x 103 cells/well). MSCs were treated with different concentrations of nicorandil when reached 80% confluence. After 24h pretreatment, 10μL CCK-8 regent (Dojindo, Japan) was added to each well and co‐cultured at 37 oC for 2h. After that, absorbances at 450nm were measured with a microplate reader (infinite-M200, Tecan, Switzerland).

**Western blot analysis**

Cells and heart tissue were lysed in ice-cold RIPA Lysis buffer (P0013C, Beyotime, China) supplemented with a protease inhibitor cocktail (04693116001, Roche, UK). Protein concentration was determined by BCA protein assay (P0010, Beyotime, China). Proteins (15-30μg) loaded with 5x loading buffer were separated by sodium dodecyl sulfate–polyacrylamide gel electrophoresis (SDS-PAGE) and then transferred onto polyvinylidene difluoride membranes (Millipore). Membranes were blocked with 1x TBST containing 5% skim milk for 2 hours at room temperature and then incubated with primary antibodies at 4°C overnight. Primary antibodies used in western blot were as follows: anti-β-tubulin (2128, 1:3000, Cell Signaling Technology, USA), anti-Arg1 (93668, 1:1000, Cell Signaling Technology, USA), anti-Mrc1 (60143-1-Ig, 1:500, Proteintech, USA), anti-TRAF6 (ab33915, 1:1000, Abcam, UK), anti-IRF5 (ab181553, 1:1000, Abcam, UK), anti-GAPDH (2118, 1:3000, Cell Signaling Technology, USA). The next day, membranes were incubated with secondary horseradish peroxidase (HRP)-conjugated antibodies (ZB-2301/ ZB-2305, ZSGB-BIO, China) for 1 hour at room temperature. Protein bands were visualized with enhanced chemiluminescence reagents (1705061, Bio-Rad, USA) and Tanon 5800 Multi Imaging System (Tanon, Germany). ImageJ software was used to measure the gray values of protein bands.

**Luciferase reporter assay**

1×104 HEK293T cells were seeded in a 96-well plate. When the cells reached 60-70% confluence, miR-125a-5p mimics or mimic NC and TRAF6 wild type (WT) or mutated (Mut) 3’UTR reporter plasmids were transfected into HEK293T cells using Lipofectamine® 3000 Transfection Reagent (Invitrogen, USA) following the manufacturer’s protocol. After 48 hours incubation, firefly luciferase and Renilla luciferase activites were detected using Dual-Luciferase Reporter Assay System (Promega, USA). The ratio of Firefly luciferase activity to Renilla luciferase activity provides relative luciferase activity.

**Supplementary Tables**

**Supplementary table 1: List of specific primary antibodies**

| **Primary antibodies** | **Manufacturer** | **Catalog No.** | **Dilution** |
| --- | --- | --- | --- |
| CD90 Monoclonal antibody | Invitrogen | 45-0900-80 | 1:200 |
| CD29 Monoclonal antibody | Invitrogen | 12-0291-81 | 1:100 |
| CD45 Monoclonal antibody | Invitrogen | 11-0461-80 | 1:100 |
| CD11 Monoclonal antibody | Invitrogen | MA1-21592 | 1:100 |
| CD73 Polyclonal antibody | Proteintech | 12231-1-AP | 1:1000 |
| Anti-TSG101 antibody | Santa Cruz Biotechnology | sc-7964 | 1:1000 |
| Alix Mouse Monoclonal antibody | Cell Signaling Technology | 2171 | 1:1000 |
| Anti-Cardiac Troponin T antibody | Abcam | ab209813 | 1:200 |
| Anti-CD68 antibody | Abcam | ab125212 | 1:200 |
| Anti-CD31 antibody | Abcam | ab222783 | 1:200 |
| Anti-α-SMA antibody | Abcam | ab124964 | 1:200 |
| CD206 Monoclonal antibody | Proteintech | 60143-1-Ig | 1:200 |
| GAPDH Rabbit Monoclonal antibody | Cell Signaling Technology | 2118 | 1:3000 |
| β-Tubulin Rabbit monoclonal antibody | Cell Signaling Technology | 2128 | 1:3000 |
| Arginase-1 Rabbit monoclonal antibody | Cell Signaling Technology | 93668 | 1:1000 |
| anti-TRAF6 antibody | Abcam | ab33915 | 1:1000 |
| anti-IRF5 antibody | Abcam | ab181553 | 1:1000 |

**Supplementary table 2: Primers used for qRT-PCR**

| Gene name | Primer sequence (5’-3’) |
| --- | --- |
| *Gapdh* | Forward: 5’-GGCCAAGGTCATCCATGA-3’  Reverse: 5’-TCAGTGTAGCCCAGGATG-3’ |
| *Mrc1* | Forward: 5’-GCAGATCATGAGTGTTGCTTTCA-3’  Reverse: 5’-TGTGTCGTTTTTACACTCCCATTT-3’ |
| *IL-4R* | Forward: 5’-AGTGGGCAAGCTTCTACGTC-3’  Reverse: 5’-CTGTGCCAGTTGCTCTCTCA-3’ |
| *IL-10* | Forward: 5’-TTGAACCACCCGGCATCTAC-3’  Reverse: 5’-CCAAGGAGTTGCTCCCGTTA-3’ |
| *Tgfb1* | Forward: 5’-CCCCACTGATACGCCTGAG-3’  Reverse: 5’-GCCCTGTATTCCGTCTCCTT-3’ |
| *Vegfa* | Forward: 5’-GCCTTGTTCAGAGCGGAGAA-3’  Reverse: 5’-ACGCGAGTCTGTGTTTTTGC -3’ |
| *Arg1* | Forward: 5’-TTGGAACGAAACGGGAAGGT-3’  Reverse: 5’-TGTTCGGTTTGCTGTGATGC-3’ |
| *TNF-a* | Forward: 5’-GATTTGGTGACCAGGCTGTC-3’  Reverse: 5’-ATGACCCGTAGGGCGATT-3’ |
| *IL-1β* | Forward: 5’-AGGATGAGGACCCAAGCAC-3’  Reverse: 5’-TCAGACAGCACGAGGCATT-3’ |
| *IL-6* | Forward: 5’-GTTGCCTTCTTGGGACTGATG-3’  Reverse: 5’-GAAGTCTCCTCTCCGGACTTGT-3’ |

**Supplementary table 3: Comparisons of cardiac function, infarct size, collagen area, macrophage polarization among the different AMI groups in rats.**

|  | Sham | AMI | MSC-Exo | MSCNIC-Exo |
| --- | --- | --- | --- | --- |
| LVEF (%) | 77.05±1.140 | 23.63±2.554 | 33.13±2.401* | 42.00±2.060****# |
| LVFS (%) | 46.66±1.129 | 11.51±1.361 | 16.63±1.326* | 21.64±1.205****# |
| LVEDV (μL) | 189.9±12.30 | 448.5±49.29 | 449.7±35.19 | 400.4±33.91 |
| LVESV (μL) | 43.12±2.831 | 340.7±37.29 | 301.6±27.19 | 234.0±22.45* |
| Infarct size (%) | 2.782±0.2590 | 53.88±1.811 | 44.83±1.100*** | 30.38±2.089****## |
| Collagen area (%) | 3.747±0.4248 | 40.05±2.348 | 29.33±3.495** | 19.49±1.249****# |
| CD31+ capillary density /HPF | 0.3500±0.1258 | 3.300±0.2646 | 6.150±0.3096** | 9.200±0.7832****## |
| α-SMA+ arteriole density /HPF | 1.560±0.3600 | 4.750±0.3304 | 6.050±0.3096 | 8.900±0.7416***## |
| CD68+CD206+ /CD68+ (%) | 0.000±0.000 | 7.303±0.8796 | 36.12±2.371**** | 65.73±3.280****## |
| Relative mRNA expression level (IL-1β/GAPDH) | 1.007±0.05860 | 3.113±0.4902 | 1.443±0.1369** | 0.9331±0.1816*** |
| Relative mRNA expression level (IL-6/GAPDH) | 2.010±0.6557 | 17.89±2.129 | 4.167±1.140**** | 3.643±0.5241**** |
| Relative mRNA expression level (TNF-α/GAPDH) | 1.022±0.1084 | 4.915±0.7024 | 2.399±0.1535** | 1.606±0.1434**** |
| Relative mRNA expression level (Mrc1/GAPDH) | 1.088±0.1972 | 3.447±0.6118 | 4.878±0.6274 | 7.276±0.6373***# |
| Relative mRNA expression level (Tgfb1/GAPDH) | 1.128±0.2683 | 0.8333±0.2384 | 1.538±0.5067 | 2.837±0.4620* |
| Relative mRNA expression level (IL-4R/GAPDH) | 1.097±0.2208 | 1.410±0.2440 | 1.894±0.2487 | 2.607±0.2599* |
| Relative mRNA expression level (Arg1/GAPDH) | 0.9393±0.1922 | 4.381±1.259 | 4.280±0.9111 | 9.399±1.782*# |
| Relative protein expression level (Arg1/β-tubulin) | 0.03201±0.01750 | 0.05727±0.01079 | 0.1950±0.03240** | 0.3714±0.03046****## |
| IL-6 (pg/mL) | 1015±94.55 | 3021±295.6 | 2292±112.5 | 1809±175.1** |
| TNF-α (pg/mL) | 1737±109.4 | 2770±78.03 | 2469±95.26 | 2158±73.69** |

For cardiac function analysis, n = 9-10 for each group. For the analysis of infarct size, collagen area, n = 9-10 for each group; for quantification of CD31+ capillary density and α-SMA+ arteriole density at the border zone, n=4 for each group; for quantification of CD68 and CD206 positively stained macrophage at the border zone, n=5 for each group; for the relative mRNA expression level of Mrc1、Arg1、IL-4R、Tgfb1、IL-1β、IL-6、TNF-α in myocardial tissue, n=5 for each group; for relative protein expression level of Arg1 in myocardial tissue, n = 5 for each group; for quantification of IL-6 and TNF-α levels in infarct border zone tissue of rat hearts, n=5 for each group. All data are expressed as mean ± SEM and were analyzed with one-way ANOVA followed by Tukey’s test. *, *p*<0.05, **, *p*<0.01, ***, *p*<0.001, ****, *p*<0.0001 compared with AMI group; #, *p*<0.05, ##, *p*<0.01 compared with MSC-exo group;

**Supplementary table 4 Protein and mRNA relative expression level of M2 polarization markers of macrophage after PBS, MSC-exo and MSCNIC-exo treatment.**

|  | PBS | MSC-exo | MSCNIC-exo |
| --- | --- | --- | --- |
| Relative mRNA expression level (IL-1β/GAPDH) | 1.006±0.05140 | 0.7572±0.03733** | 0.5817±0.04453****# |
| Relative mRNA expression level (TNF-α/GAPDH) | 1.014±0.07517 | 0.7821±0.05486* | 0.5626±0.01903****# |
| Relative mRNA expression level (Mrc1/GAPDH) | 1.001±0.01629 | 0.7671±0.05652 | 2.000±0.1654****## |
| Relative mRNA expression level (Tgfb1/GAPDH) | 1.002±0.02879 | 1.033±0.07193 | 1.288±0.01538**## |
| Relative mRNA expression level (IL-4R/GAPDH) | 1.007±0.05296 | 0.9072±0.06171 | 1.455±0.06495***## |
| Relative mRNA expression level (IL-10/GAPDH) | 1.024±0.09750 | 1.444±0.3952 | 4.832±0.5349****## |
| Relative mRNA expression level (Vegfa/GAPDH) | 1.005±0.04448 | 1.436±0.2184 | 2.607±0.2432****## |
| Relative mRNA expression level (Arg1/GAPDH) | 1.010±0.06038 | 1.061±0.1402 | 2.389±0.2416****## |
| Relative protein expression level (Arg1/β-tubulin) | 0.4587±0.07948 | 0.5995±0.03339 | 1.572±0.05578****## |

For the relative mRNA expression level of Mrc1, Arg1, IL-4R, Tgfb1, Vegfa, IL-10, IL-1β, TNF-α in macrophage, n=6 for each group; for relative protein expression level of Arg1 in macrophage, n=4 for each group; All data are expressed as mean ± SEM and were analyzed with one-way ANOVA followed by Tukey’s test. *, *p*<0.05, **, *p*<0.01, ***, *p*<0.001, ****, *p*<0.0001 compared with PBS group; #, *p*<0.05, ##, *p*<0.01 compared with MSCs-exo group.

**Supplementary table 5: Comparisons of cardiac function, infarct size, collagen area, macrophage polarization among the different AMI groups in rats.**

|  | Sham | AMI | MSC-exo(mimic NC) | MSC-exo(mimics) | MSCNIC-exo(inhibitor NC) | MSCNIC-exo (inhibitors) |
| --- | --- | --- | --- | --- | --- | --- |
| LVEF (%) | 81.94 ±2.714 | 23.68±1.926 | 33.29±1.677* | 41.15±2.263**** | 48.09±1.486****#### | 30.75±1.213$$&&&& |
| LVFS (%) | 52.92±3.385 | 11.49±0.9872 | 16.59±0.9273 | 21.13±1.324** | 25.24±0.8648****# | 15.20±0.6576&& |
| LVEDV (μL) | 181.0±17.39 | 448.6±35.87 | 400.1±28.49 | 378.1±20.65 | 362.5±36.57 | 403.9±16.05 |
| LVESV (μL) | 35.10±7.255 | 344.3±31.14 | 268.8±22.02 | 224.3±17.71** | 191.5±23.29**** | 280.2±13.95& |
| Infarct size (%) | 0.000±0.000 | 55.14±2.297 | 46.07±1.431* | 35.79±1.365****# | 38.03±1.953****# | 50.00±2.785$$$$&&& |
| Collagen area (%) | 1.519±0.2659 | 46.46±1.519 | 31.80±1.914**** | 23.80±2.739****# | 22.38±1.825****# | 32.31±1.938****$&& |
| CD31+ capillary density /HPF | 0.6500±0.2986 | 3.700±0.4203 | 5.550±0.3304 | 8.500±0.8813***# | 9.700±0.7724**** | 5.900±0.2646$&& |
| α-SMA+ arteriole density /HPF | 1.560±0.2135 | 3.800±0.1414 | 5.700±0.2082 | 8.400±1.003** | 10.05±1.520*** | 6.300±0.3000& |
| CD68+CD206+ /CD68+ (%) | 0.000±0.000 | 6.279±0.7783 | 38.33±2.138**** | 52.32±4.922****## | 62.44±4.530****#### | 47.64±1.189****& |
| Relative mRNA expression level (Mrc1/GAPDH) | 1.091±0.2497 | 3.842±0.1384 | 6.922±1.016 | 11.66±1.707*** | 20.23±1.651****####$$$ | 9.658±0.9953*&&&& |
| Relative mRNA expression level (Tgfb1/GAPDH) | 1.073±0.2263 | 2.745±0.2628 | 3.148±0.5910 | 10.56±2.087****### | 13.18±0.7159****#### | 3.511±0.5831$$$&&&& |
| Relative mRNA expression level (IL-4R/GAPDH) | 1.270±0.5081 | 2.455±0.2788 | 2.819±0.2087 | 4.947±0.5783*# | 5.853±0.5582***## | 3.101±0.5426&& |
| Relative mRNA expression level (Arg1/GAPDH) | 1.237±0.4833 | 3.295±0.6163 | 5.033±0.9003 | 21.27±1.922****#### | 17.03±1.910****#### | 3.745±0.4470$$$$&&&& |
| Relative mRNA expression level (IL-1β/GAPDH) | 1.077±0.2163 | 3.564±0.3873 | 2.613±0.4733 | 1.346±0.08892*** | 1.294±0.1242***# | 2.056±0.2936* |
| Relative mRNA expression level (IL-6/GAPDH) | 1.280±0.3574 | 15.10±1.458 | 6.342±0.5647**** | 4.110±0.8412**** | 2.508±0.6287****# | 7.546±0.8173****&& |
| Relative mRNA expression level (TNF-α/GAPDH) | 1.013±0.08664 | 6.148±0.6356 | 3.241±0.3363**** | 1.385±0.1478****# | 1.585±0.2059****# | 3.333±0.3893$$& |
| Relative protein expression level (Arg1/β-tubulin) | 0.05443±0.01165 | 0.2171±0.04647 | 0.6523±0.1040** | 0.7386±0.05741***## | 0.6706±0.07127** | 0.3206±0.08058#$$& |

For cardiac function analysis, n = 9-10 for each group. For the analysis of infarct size, collagen area, n = 7 for each group; for quantification of CD31+ capillary density and α-SMA+ arteriole density at the border zone, n=4 for each group; for quantification of CD68 and CD206 positively stained macrophage at the border zone, n=5 for each group; for the relative mRNA expression level of Mrc1、Arg1、IL-4R、Tgfb1、IL-1β、IL-6 in myocardial tissue, n=5 for each group; for relative protein expression level of ARG1 in myocardial tissue, n = 5 for each group. All data are expressed as mean ± SEM and was analyzed with one-way ANOVA followed by Tukey’s test. *, *p*<0.05, **, *p*<0.01, ***, *p*<0.001, ****, *p*<0.0001 compared with AMI group; #, *p*<0.05, ##, *p*<0.01, ###, *p*<0.001, ####, *p*<0.0001 compared with MSC-exo(mimic NC) group; $, *p*<0.05, $$, *p*<0.01, $$$, *p*<0.001,$$$$, *p*<0.0001 compared with MSC-exo(mimics) group;&, *p*<0.05,&&, *p*<0.01,&&&, *p*<0.001,&&&& , *p*<0.0001 compared with MSCNIC-exo(inhibitor NC) group.

**Supplementary table 6 Protein, mRNA relative expression level of M2 polarization markers and TRAF6 of macrophage after treating with differently transfected-MSCs derived exosomes.**

|  | Control | MSC-exo(mimic NC) | MSC-exo(mimics) | MSCNIC-exo(inhibitor NC) | MSCNIC-exo(inhibitors) |
| --- | --- | --- | --- | --- | --- |
| Relative mRNA expression level (Mrc1/GAPDH) | 1.018±0.09365 | 1.299±0.08804 | 3.931±0.3204****#### | 2.202±0.1379**#$$$$ | 1.335±0.1355$$$$& |
| Relative mRNA expression level (Tgfb1/GAPDH) | 1.017±0.09733 | 1.110±0.1129 | 1.899±0.1462***## | 1.359±0.1703$ | 1.119±0.08417$$ |
| Relative mRNA expression level (IL-4R/GAPDH) | 1.013±0.07970 | 1.345±0.1418 | 2.609±0.3458****#### | 1.331±0.03788 | 0.7607±0.05139$$$$ |
| Relative mRNA expression level (Arg1/GAPDH) | 1.027±0.1237 | 1.077±0.2017 | 2.029±0.2291*# | 1.959±0.2457*# | 1.113±0.2134$ |
| Relative mRNA expression level (IL-1β/GAPDH) | 1.086±0.2361 | 0.5862±0.1365 | 0.07195±0.01975** | 0.5521±0.1012 | 0.7754±0.1841$ |
| Relative mRNA expression level (TNF-α/GAPDH) | 1.056±0.1617 | 0.5753±0.05505** | 0.1612±0.02618****# | 0.1955±0.03980****# | 0.8963±0.08044$$$$&&& |
| Relative protein expression level (Mrc1/β-tubulin) | 0.5163±0.04214 | 0.8308±0.06636 | 1.110±0.1230** | 1.253±0.06657***# | 1.164±0.1495** |
| Relative protein expression level (Arg1/β-tubulin) | 1.022±0.08660 | 1.184±0.05894 | 1.759±0.1392***## | 1.374±0.1079 | 0.7481±0.1052$$$&& |
| Relative mRNA expression level (TRAF6/GAPDH) | 1.014±0.09361 | 0.9539±0.04880*** | 0.6115±0.03152**## | 0.7474±0.06341* | 0.9663±0.03177$$ |
| Relative protein expression level (TRAF6/GAPDH) | 0.5165±0.06757 | 0.6717±0.03657 | 0.4297±0.02284* | 0.5768±0.05854 | 0.6067±0.08046 |

For the relative mRNA expression level of Mrc1, Arg1, IL-4R, Tgfb1, IL-1β, TNF-α and TRAF6 in BMDMs, n=5 for each group; for relative protein expression level of Mrc1, Arg1, TRAF6 in BMDMs, n=5 for each group. All data are expressed as mean ± SEM and was analyzed with one-way ANOVA followed by Tukey’s test. *, *p*<0.05, **, *p*<0.01, ***, *p*<0.001, ****, *p*<0.0001 compared with control group; #, *p*<0.05, ##, *p*<0.01, ###, *p*<0.001, ####, *p*<0.0001 compared with MSC-exo(mimic NC) group; $, *p*<0.05, $$, *p*<0.01, $$$, *p*<0.001,$$$$, *p*<0.0001 compared with MSC-exo(mimics) group;&, *p*<0.05,&&, *p*<0.01,&&&, *p*<0.001,&&&& , *p*<0.0001 compared with MSCNIC-exo(inhibitor NC) group.

**Supplementary table 7 Protein, mRNA relative expression level of M2 polarization markers and TRAF6 and IRF5 in macrophage after macrophage transfection.**

|  | Control | mimic NC | mimics | inhibitor NC | inhibitors |
| --- | --- | --- | --- | --- | --- |
| Relative mRNA expression level (IL-1β/GAPDH) | 1.003±0.03594 | 0.7726±0.09051 | 0.2482±0.02359***# | 0.6127±0.02653 | 1.372±0.1994##$$$$&&& |
| Relative mRNA expression level (TNF-a/GAPDH) | 1.015±0.08227 | 0.8558±0.05205 | 0.2030±0.01663****### | 0.8595±0.07841$$$ | 1.575±0.1551**###$$$$&&& |
| Relative mRNA expression level (Mrc1/GAPDH) | 1.090±0.2212 | 1.035±0.1543 | 4.751±0.5544****#### | 2.205±0.2145**#$$$$ | 0.8559±0.06031$$$$& |
| Relative mRNA expression level (Tgfb1/GAPDH) | 1.016±0.08632 | 0.8839±0.1077 | 2.745±0.4305****#### | 1.079±0.08744$$$ | 0.9756±0.03211$$$$ |
| Relative mRNA expression level (IL-4R/GAPDH) | 1.061±0.1791 | 1.404±0.2663 | 3.609±0.8627**# | 1.768±0.3521 | 1.389±0.3227& |
| Relative mRNA expression level (Arg1/GAPDH) | 1.124±0.2581 | 2.955±0.6264 | 8.616±1.535****### | 4.336±0.3147$$ | 0.8460±0.1729$$$$& |
| Relative protein expression level (Mrc1/β-tubulin) | 0.2116±0.02152 | 0.2559±0.03736 | 0.3885±0.03864**# | 0.3426±0.02263* | 0.3177±0.02986** |
| Relative protein expression level (Arg1/β-tubulin) | 0.02425±0.003487 | 0.2501±0.02589** | 0.5901±0.05785****#### | 0.3899±0.05653****$ | 0.04873±0.006566#$$$$&&&& |
| Relative mRNA expression level (TRAF6/GAPDH) | 0.9613±0.1119 | 1.457±0.08242 | 0.7293±0.05027# | 1.451±0.1690$ | 2.840±0.2339****####$$$$&&&& |
| Relative protein expression level (TRAF6/GAPDH) | 0.8570±0.04078 | 0.7790±0.05349 | 0.5081±0.03593***## | 0.7238±0.03181$ | 0.9768±0.05955$$$$& |
| Relative protein expression level (IRF5/GAPDH) | 0.7776±0.01366 | 0.6968±0.05245 | 0.3685±0.04983***## | 0.6138±0.02424$ | 0.8057±0.09649$$$ |

For the relative mRNA expression level of Mrc1, Arg1, IL-4R, Tgfb1, IL-1β, TNF-α, TRAF6 in BMDMs, n=5 for each group; for relative protein expression level of Mrc1, Arg1 in BMDMs, n=5 for each group; for relative protein expression level of TRAF6 and IRF5 in BMDMs, n=4 for each group. All data are expressed as mean ± SEM and was analyzed with one-way ANOVA followed by Tukey’s test. *, *p*<0.05, **, *p*<0.01, ***, *p*<0.001, ****, *p*<0.0001 compared with control group; #, *p*<0.05, ##, *p*<0.01, ###, *p*<0.001, ####, *p*<0.0001 compared with mimic NC group; $, *p*<0.05, $$, *p*<0.01, $$$, *p*<0.001,$$$$, *p*<0.0001 compared with mimics group;&, *p*<0.05,&&, *p*<0.01,&&&, *p*<0.001,&&&& , *p*<0.0001 compared with inhibitor NC group.

**Supplementary table 8 Predicted consequential pairing of miR-125a-5p and its candidate target site in the 3’UTR of TRAF6.**

|  | **Predicted consequential pairing of target region (top) and miRNA (bottom)** | **Site type** | **Context++ score** | **Context++ score percentile** | **Weighted context++ score** | **Conserved branch length** | **PCT** | **Predicted relative KD** |
| --- | --- | --- | --- | --- | --- | --- | --- | --- |
| Position 1141-1148 of TRAF6 3' UTR [rno-miR-125a-5p](http://www.mirbase.org/cgi-bin/mirna_entry.pl?acc=rno-miR-146a-5p) | 5'   ... CUUUGGAGUCUAGUUCUCAGGGA...                         |||||||  3'        AGUGUCCAAUUUCCCAGAGUCCCU | 8mer | -0.29 | 93 | -0.12 | 3.098 | 0.60 | N/A |

**Supplementary table 9 Protein, mRNA relative expression level of M2 polarization markers and TRAF6 and IRF5 in macrophage after si-TRAF6 transfection.**

|  | Control | si-TRAF6 NC | si-TRAF6 |
| --- | --- | --- | --- |
| Relative mRNA expression level (TRAF6/GAPDH) | 1.010±0.07964 | 1.334±0.09360 | 0.4530±0.02036**#### |
| Relative protein expression level (TRAF6/GAPDH) | 1.031±0.04794 | 1.196±0.1204 | 0.3098±0.04958***#### |
| Relative protein expression level (IRF5/GAPDH) | 0.9223±0.06560 | 0.7399±0.08474 | 0.4586±0.03574***# |
| Relative mRNA expression level (Mrc1/GAPDH) | 1.020±0.08658 | 0.9212±0.08021 | 1.827±0.2305**## |
| Relative mRNA expression level (Arg1/GAPDH) | 1.006±0.04660 | 2.577±0.2557 | 4.575±0.5025****## |
| Relative mRNA expression level (IL-1β/GAPDH) | 1.005±0.04590 | 1.026±0.08007 | 0.7360±0.04334*## |
| Relative mRNA expression level (TNF-α/GAPDH) | 1.017±0.09796 | 0.8974±0.07416 | 0.2177±0.02919****#### |
| Relative protein expression level (Arg1/β-tubulin) | 0.7043±0.07973 | 0.7551±0.1623 | 1.321±0.08131*# |

For relative protein expression level of TRAF6 and Arg1 in BMDMs, n=4 for each group; For relative protein expression level of IRF5 in BMDMs, n=6 for each group; For the relative mRNA expression level of Mrc1, Arg1, IL-1β, TNF-α, TRAF6 in BMDMs, n=4-6 for each group; All data are expressed as mean ± SEM and was analyzed with one-way ANOVA followed by Tukey’s test. *, *p*<0.05, **, *p*<0.01, ***, *p*<0.001, ****, *p*<0.0001 compared with control group; #, *p*<0.05, ##, *p*<0.01, ###, *p*<0.001, ####, *p*<0.0001 compared with si-TRAF6 NC group.

**Supplementary Figures**

**Supplementary figure 1**


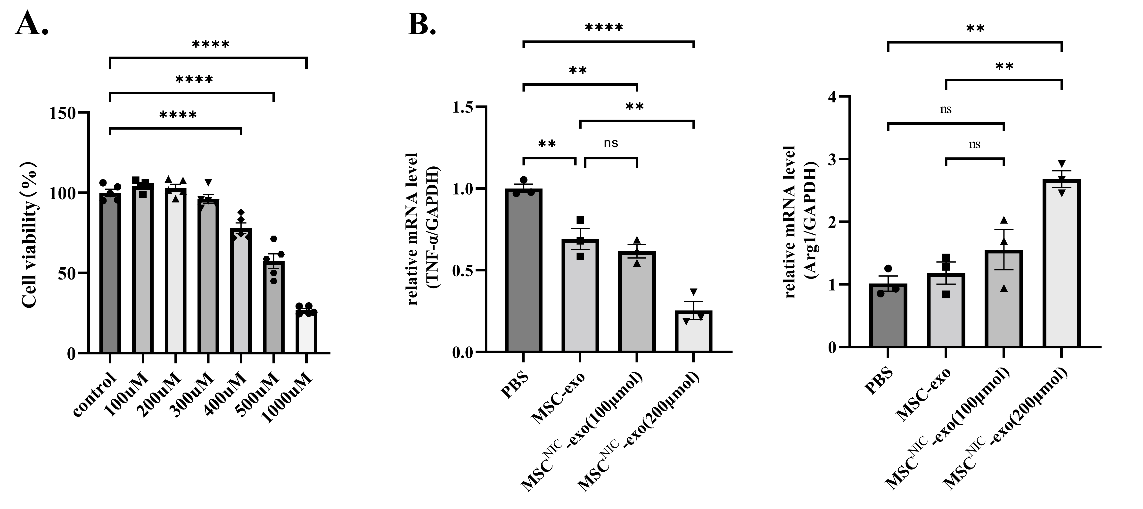


**Supplementary figure 1.** CCK8 assay forMSC pretreated with different concentration of nicorandil and the ability of different exosomes to promote M2 macrophage polarization. **(A)** Cell viability of MSC pretreated with different concentration of nicorandil (n=5). **(B)** TNF-α and Arg1mRNAexpression of BMDM treated with exosomes derived from non-pretreated MSC orMSC pretreated with different concentration of nicorandil (100 or 200μM) (n=3). All data are expressed as mean ± SEM and was analyzed with one-way ANOVA followed by Tukey’s test. *, *p*<0.05, **, *p*<0.01, ***, *p*<0.001, ****, *p*<0.0001.

**Supplementary figure 2**


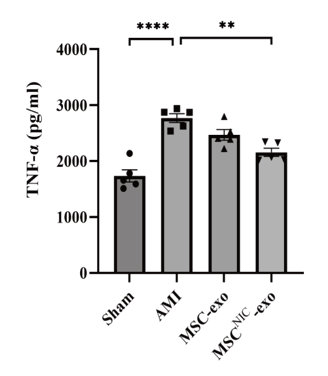


**Supplementary figure 2 Levels of TNF-α in infarct hearts of rats treated with different exosomes.** n=5. All data are expressed as mean ± SEM and was analyzed with one-way ANOVA followed by Tukey’s test. *, *p*<0.05, **, *p*<0.01, ***, *p*<0.001, ****, *p*<0.0001

**Supplementary figure 3**


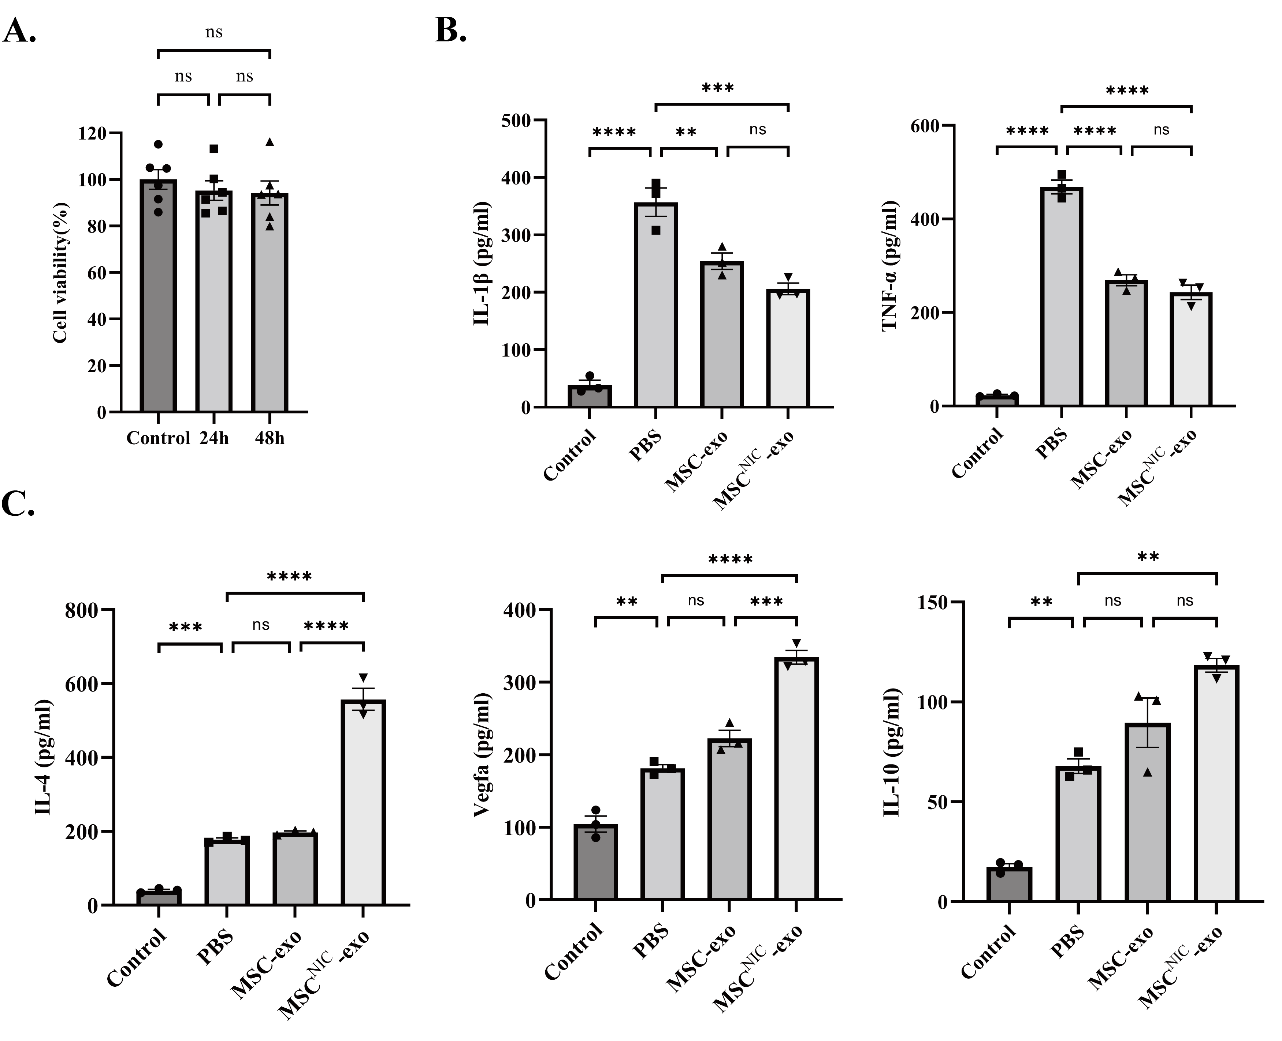


**Supplementary figure 3 Cell viability and M2 polarization of BMDM after treated with exosomes for different time duration.** n=3. **(A)** Cell viability of BMDM treated with MSC-exo for 24h or 48h (n=6). **(B)** IL-1β and TNF-α in the supernatant of control group and BMDM after treated with PBS or exosomes for 24h (n=3). **(C)** IL-4、Vegfa and IL-10 in the supernatant of control group and BMDM after treated with PBS or exosomes for 24h (n=3). We found BMDM treated with exosomes for 24h or 48h had similar cell viability. In the mean time,BMDM treated with exosomes for 24h have higher IL-1β、TNF-α expression level as well as lower IL-4、Vegfa and IL-10 expression level, so we treated BMDM with different exosomes for 48h in the following experiments. All data are expressed as mean ± SEM and was analyzed with one-way ANOVA followed by Tukey’s test. *, *p*<0.05, **, *p*<0.01, ***, *p*<0.001, ****, *p*<0.0001.

**Supplementary figure 4**


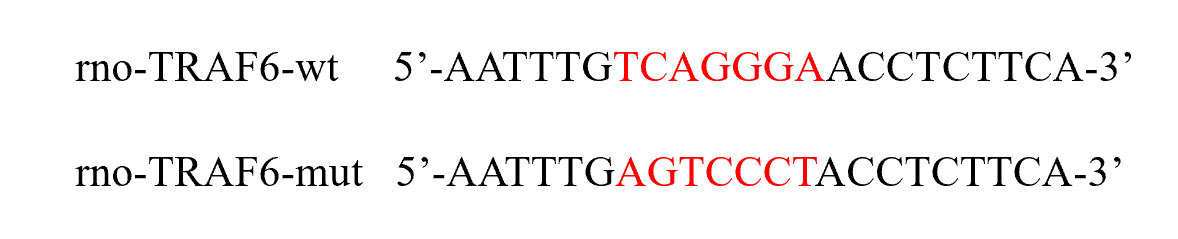


**Supplementary figure 4 The segment of TRAF6 3’UTR or a mutated segment.**
